# Supplementary material for: Intracellular Metabolomics Identifies Efflux Transporter Inhibitors in a Routine Caco-2 Cell Permeability Assay—Biological Implications
Source: MDPI journal article supplement (doi:10.3390/cells11203286), 2022-10-19
Supplement: s1 [file s1]

## Supplementary material

### Intracellular metabolomics identifies Efflux transporter inhibitors in a routine Caco-2 cell permeability assay- Biological implications.

Afia Naseem<sup>1</sup>, Akos Pal<sup>1</sup>, Sharon Gowan<sup>1</sup>, Yasmin Asad<sup>1</sup>, Adam Donovan<sup>1</sup>, Csilla Temesszentandrás-Ambrus<sup>2</sup>, Emese Kis<sup>2</sup> Zsuzsanna Gaborik<sup>2</sup>, Gurdip Bhalay<sup>1</sup>, Florence Raynaud<sup>1,\*</sup>

**A** % relative transport of Pgp, BCRP and MRP2 probe substrates with Pgp, BCRP and MRP2 inhibitors

|                 |                         | Pgp substrate | BCRP substrate | MRP2 substrate |
|-----------------|-------------------------|---------------|----------------|----------------|
| Main inhibitors | Zosuquidar (5 µM)       | <b>2</b>      | 64             | 66             |
|                 | Ko143 (10 µM)           | 57            | <b>2</b>       | 62             |
|                 | MK571 (200 µM)          | 3             | 1              | <b>10</b>      |
| Pgp inhibitors  | Valspodar (50 nM)       | <b>19</b>     | 120            | 261            |
|                 | Ritonavir (10 µM)       | <b>27</b>     | 26             | 233            |
| BCRP inhibitors | FMC (5 µM)              | 45            | <b>2</b>       | 221            |
|                 | Novobiocin (30 µM)      | 62            | <b>3</b>       | 90             |
| MRP2 inhibitor  | Benzbromarone (66.6 µM) | 40            | 4              | <b>10</b>      |

**B**

% relative transport of Pgp, BCRP and MRP2 probe substrates with Pgp, BCRP and MRP2 inhibitors

|                 |                        | Pgp substrate | BCRP substrate | MRP2 substrate |
|-----------------|------------------------|---------------|----------------|----------------|
| Pgp inhibitors  | Elacridar (10 µM)      | <b>8</b>      |                |                |
|                 | Chlorpromazine (10 µM) | <b>74</b>     |                |                |
|                 | omeprazole (40 µM)     | <b>69</b>     |                |                |
| BCRP inhibitors | Febuxostat (10 µM)     |               | <b>3</b>       |                |
|                 | atorvastatin (10 µM)   |               | <b>18</b>      |                |
|                 | Quercetin (10 µM)      |               | <b>3</b>       |                |
| MRP2 inhibitors | Rifampicin (200 µM)    |               |                | <b>14</b>      |
|                 | Quercetin (200 µM)     |               |                | <b>52</b>      |

**Supplementary Table S1: Functional assessment of Pgp, BCRP and MRP2 inhibitors that were used in our experiments to generate the signature.** In these experiments, the efflux ratio of Pgp, BCRP and MRP2 substrates was calculated with and without the inhibitors. % relative transport for each inhibitor was then determined with the calculation below:

$$\% \text{ relative transport} = \frac{\text{substrate efflux ratio}}{\text{substrate+inhibitor efflux ratio}} \times 100\%$$

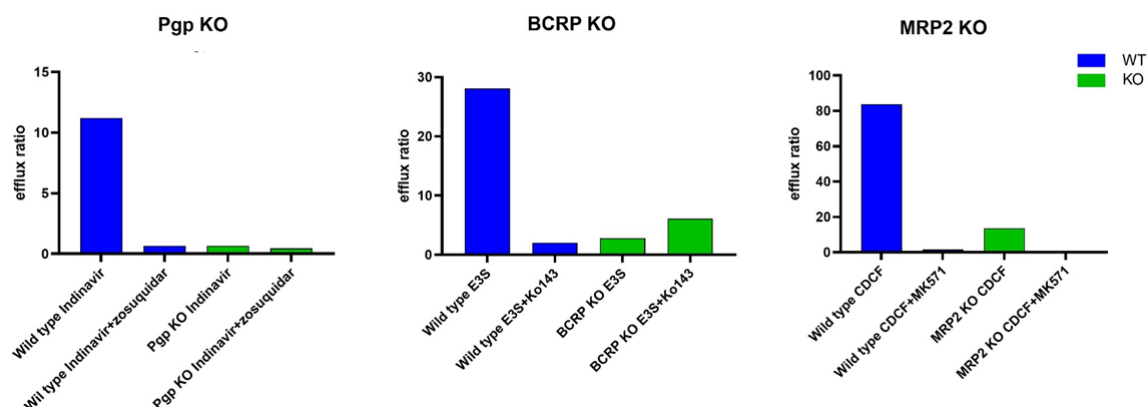

**Supplementary Figure S1 Functional assays to evaluate inhibition of transporters in KO cells.** In these experiments, the efflux ratio of Pgp, BCRP and MRP2 substrates was calculated in the KO /WT cells (C2BBel) obtained from SOLVO Biotechnology. The data shows that the efflux ratio of probe substrates was markedly reduced in KO cells

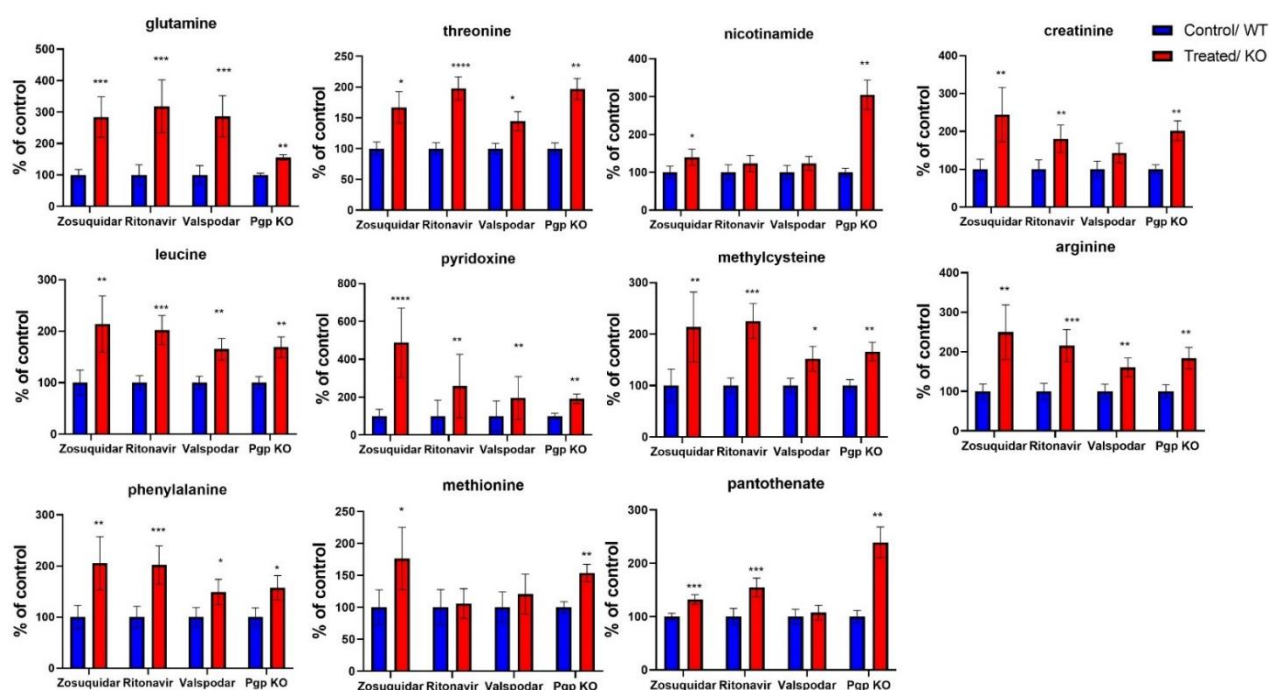

**Supplementary figure S2 representing changes in metabolites induced by Pgp inhibition in cells.** The data represent changes in metabolites in response to Pgp KO out and Pgp inhibition by zosuquidar (5  $\mu$ M), ritonavir (10  $\mu$ M), valsopodar (50 nM). The data representing changes with zosuquidar inhibition was acquired from 3 individual experiments, each experiment was performed with 6 minimum replicates and the data is presented as mean of 3 repeats. The data from other inhibitors and Pgp KO represents mean of 1 independent experiment which was performed with at least 6 replicates. The data was normalised by dividing the mean (peak area) of treated /KO group with the control group and is presented as a percentage (mean  $\pm$ SEM) of the control group. Significance of these results was determined using Mann-Whitney test and results with \* $p$ <0.05, \*\* $p$ <0.01, \*\*\* $p$ <0.001, \*\*\*\* $p$ <0.0001 were considered significant.

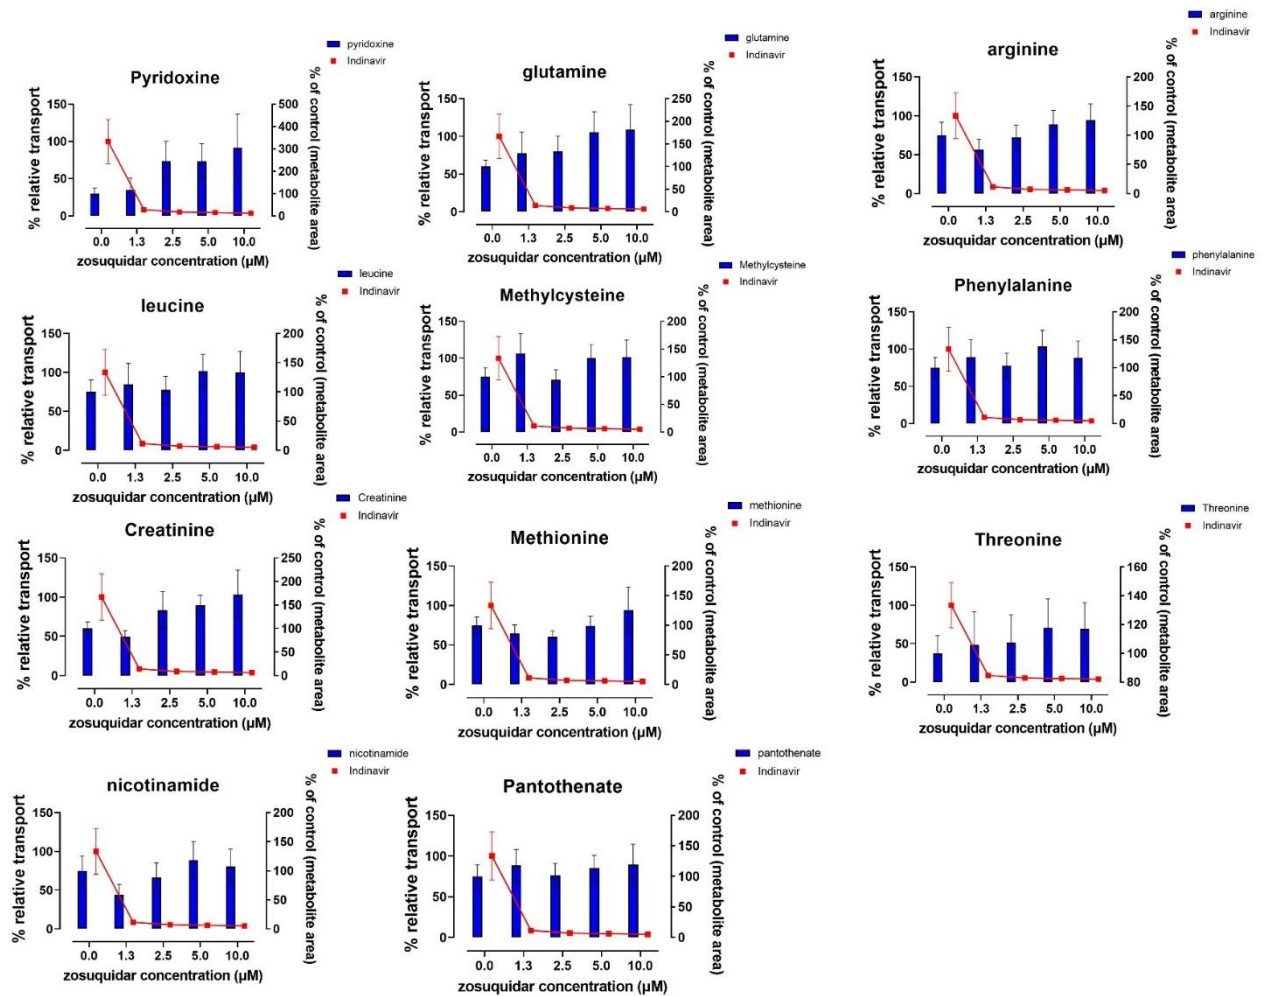

**Supplementary figure S3 representing changes in Pgp signature metabolites and Indinavir in Caco-2 cells treated with increasing concentration of zosuquidar.** The data was acquired from 3 individual experiments, each experiment was performed with 3 minimum replicates and the data is presented as mean of 3 repeats. The metabolomics data was normalised by dividing the mean (peak area) of treated group with the control group and is presented as a percentage (mean  $\pm$  SEM) of the control group.

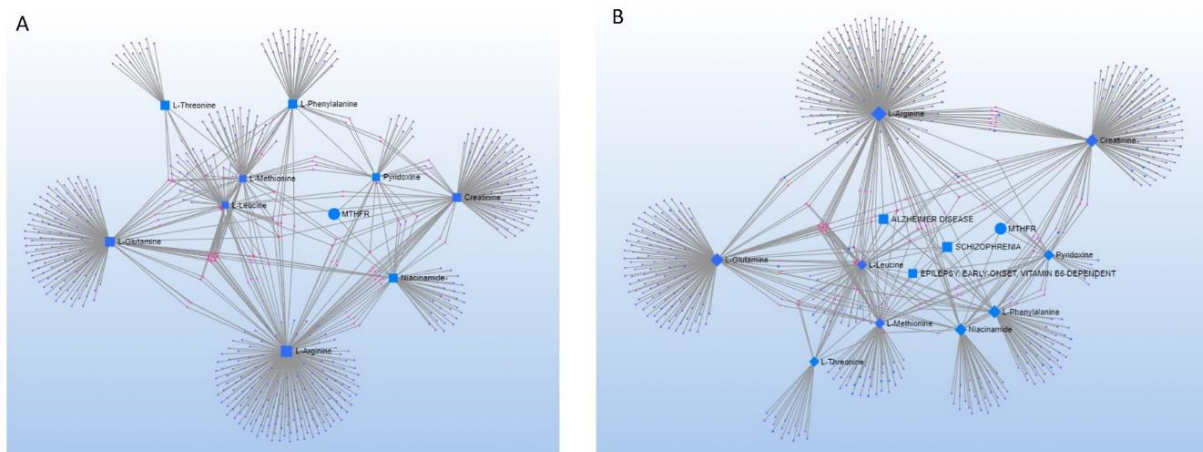

**Supplementary Figure S4 network analysis using Pgp signature metabolites(A) gene-metabolite network analysis based on Pgp signature metabolites (B) metabolite-disease analysis based on Pgp signature metabolites indicating a link between Pgp signature metabolites and neurological diseases**

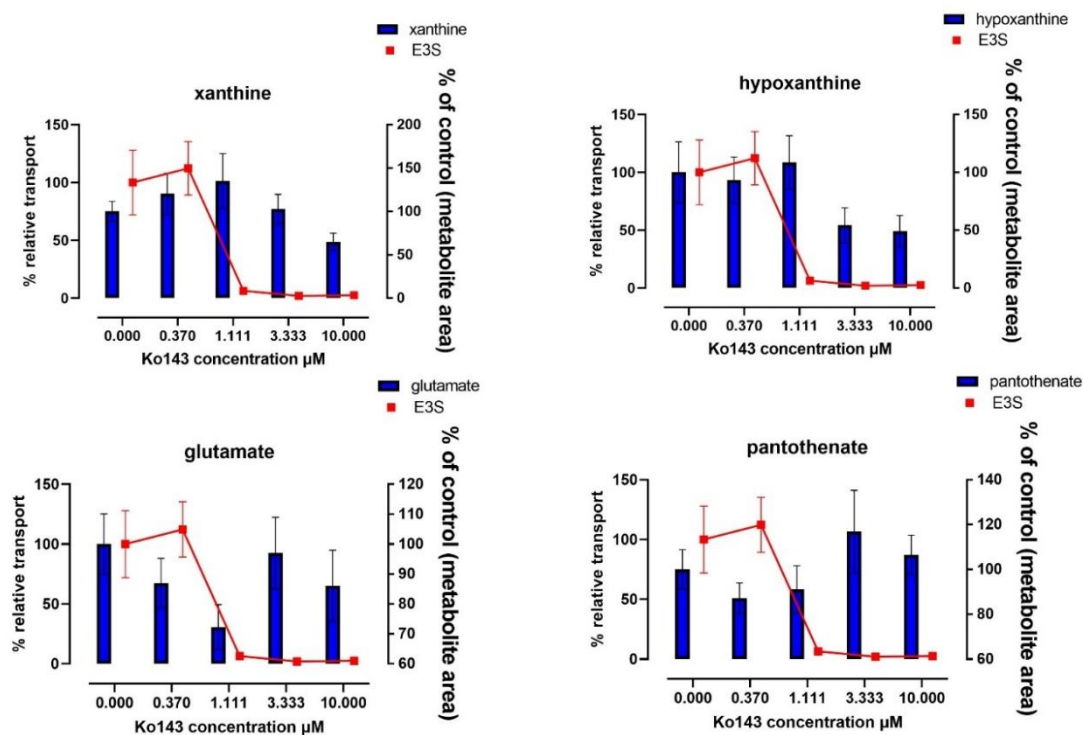

**Supplementary figure S5 representing changes in BCRP signature metabolites and E3S in Caco-2 cells treated with increasing concentration of the Ko143.** The data was acquired from 1 experiment performed with 6 minimum replicates. The metabolomics data was normalised by dividing the mean (peak area) of treated group with the control group and is presented as a percentage (mean  $\pm$  SEM) of the control group. The functional data was acquired from 3 individual experiments, each experiment was performed with 3 replicates and the data is presented as mean  $\pm$  SEM of 3 repeats.

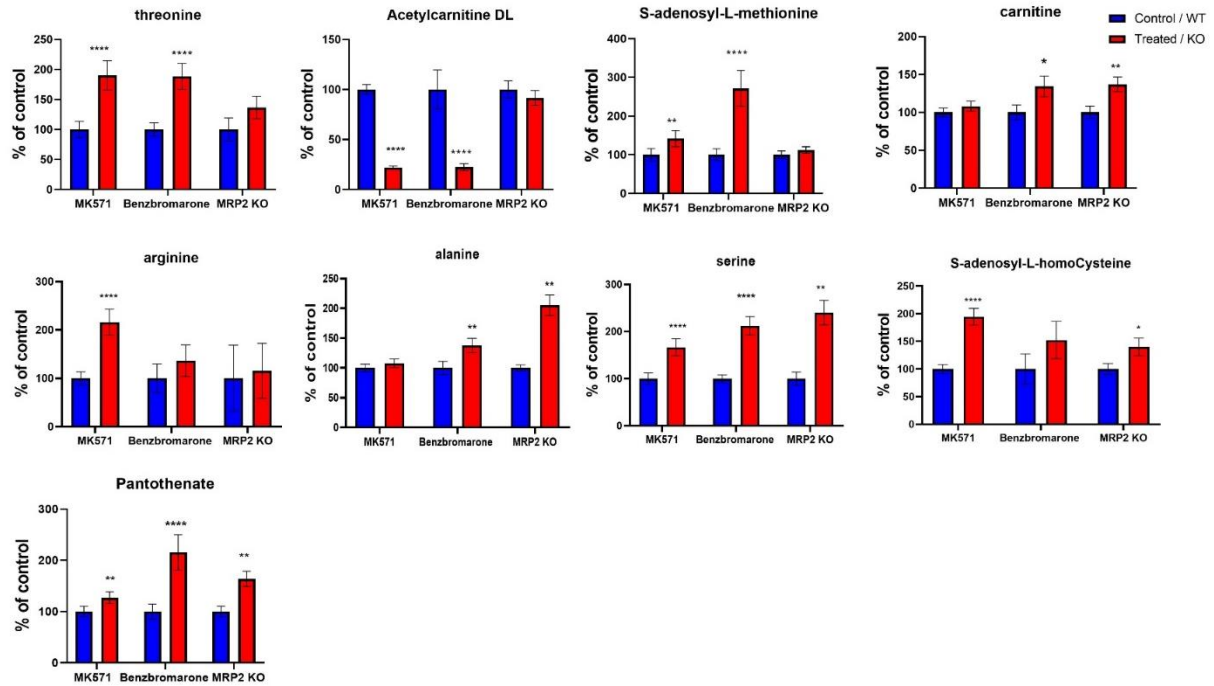

**Supplementary figure S6 representing changes in metabolites in cells treated with MRP2 inhibitors and MRP2 KO cells.** The data represent changes in metabolites in response to MRP2 KO and MRP2 inhibition by MK571 (200  $\mu$ M) and benzbromarone (66.6  $\mu$ M). The data representing changes with MK571 inhibition was acquired from 3 individual experiments, each experiment was performed with 6 minimum replicates and the data is presented as mean of 3 repeats. The data from benzbromarone and MRP2 KO represents mean of 1 independent experiment which was performed with at least 6 replicates. The data was normalised by dividing the mean (peak area) of treated /KO group with the control group and is presented as a percentage (mean  $\pm$ SEM) of the control group. Significance of these results was determined using Mann-Whitney test and results with \* $p$ <0.05, \*\* $p$ <0.01, \*\*\* $p$ <0.001, \*\*\*\* $p$ <0.0001 were considered significant





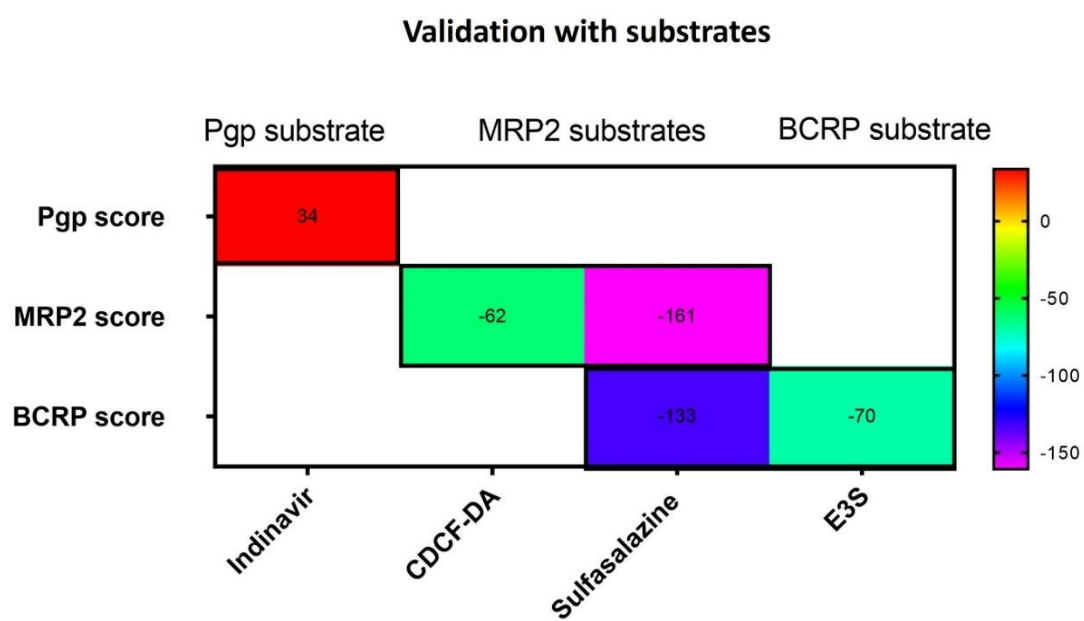

**Supplementary Figure S9: Validation of scoring system with Pgp, BCRP and MRP2 substrates.**  
The data was acquired from 1 biological experiment with minimum 6 replicates.

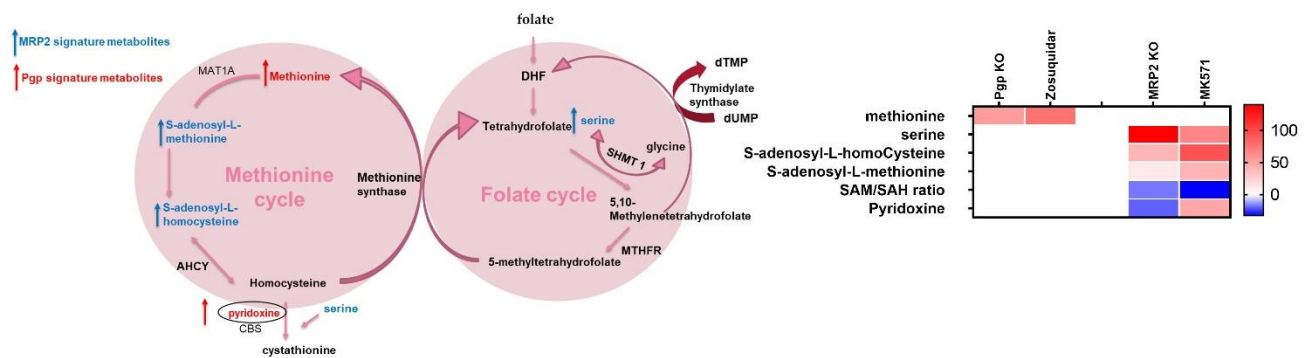

#### Changes in the Expression of Thymidylate synthase

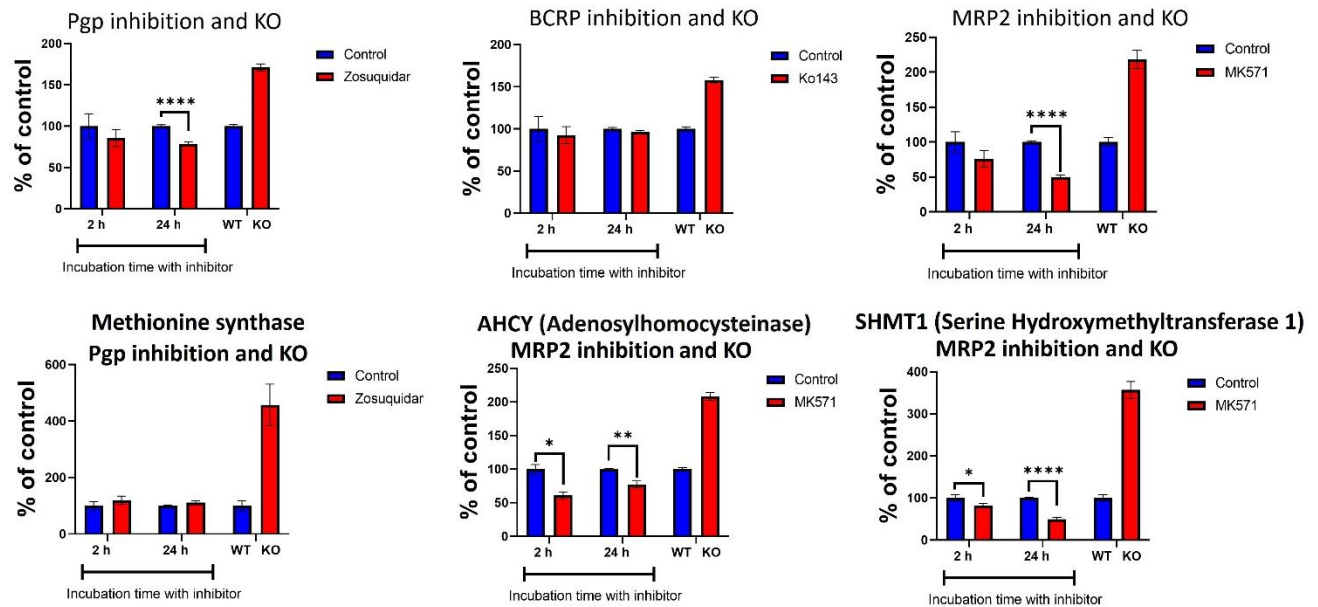

**Supplementary Figure S10: Thymidylate synthase, SHMT1, methionine synthase and AHCY expression in cells treated with zosuquidar (5  $\mu$ M), MK571 (200  $\mu$ M) and Ko143 (10  $\mu$ M) over 2 and 24 h and in cells with Pgp, BCRP KO and MRP2 KO.** Cells were grown in a transwell plate for 2 h incubation and in 6 well plate for 24 h incubation. Cells were incubated with Zosuquidar, MK571 and Ko143 for 2 h and 24 h after which cells were lysed and protein was extracted 1.2  $\mu$ g protein was loaded on WES/JESS instrument and  $\beta$  Actin or vinculin was used as a loading control. The data is normalized against  $\beta$  Actin or vinculin and is represented an average of minimum 3 replicates from one experiment with KO cells and 2 h inhibition with inhibitors. The data representing changes with 24 h incubation with inhibitors is an average of 2 biological repeats. Significance of these results was determined using Mann-Whitney test and results with \* $p$ <0.05, \*\* $p$ <0.01, \*\*\* $p$ <0.001, \*\*\*\* $p$ <0.0001 were considered significant.
